# Supplementary material for: Profiling health and socioeconomic disadvantage in the northern Adelaide Local Health Network population
Source: bioRxiv or medRxiv preprint supplement (doi:10.1101/2024.01.02.24300748), 2024-10-17
Supplement: Supplementary file [file media-1.pdf]

**Supplementary Table 1 – LHN boundaries and PHA catchment for Greater Adelaide local Health Networks.**

| <b>NALHN</b>    |                                                     |     | <b>CALHN</b>    |                                               |    | <b>SALHN</b>    |                                                   |
|-----------------|-----------------------------------------------------|-----|-----------------|-----------------------------------------------|----|-----------------|---------------------------------------------------|
| <b>LGA code</b> | <b>LGA Name</b>                                     |     | <b>LGA code</b> | <b>LGA Name</b>                               |    | <b>LGA code</b> | <b>LGA Name</b>                                   |
| 45680           | Playford                                            |     | 40070           | Adelaide City                                 |    | 42600           | Holfast Bay                                       |
| 45890           | Port Adelaide                                       |     | 40700           | Burnside                                      |    | 44060           | Marion                                            |
| 47140           | Salsibury                                           |     | 40910           | Campbeltown                                   |    | 44060           | Marion                                            |
| 47700           | Tea Tree Gully                                      |     | 41060           | Charles Sturt                                 |    | 44340           | Mitcham                                           |
|                 |                                                     |     | 45290           | Norwood / Payneham -St Peters                 |    | 45340           | Onkaparinga                                       |
|                 |                                                     |     | 45890           | Port Adelaide Enfield #                       |    |                 |                                                   |
|                 |                                                     |     | 46510           | Prospect                                      |    |                 |                                                   |
|                 |                                                     |     | 47980           | Unley                                         |    |                 |                                                   |
|                 |                                                     |     | 48260           | Walkerville                                   |    |                 |                                                   |
|                 |                                                     |     | 48410           | West Torrens                                  |    |                 |                                                   |
| <b>PHA code</b> | <b>PHA Name</b>                                     |     | <b>PHA code</b> | <b>PHA Name</b>                               |    | <b>PHA code</b> | <b>PHA Name</b>                                   |
| 40019           | Playford - West                                     |     | 40000           | Adelaide                                      |    | 40037           | Brighton (SA)/ Glenelg (SA)                       |
| 40020           | Davoren Park                                        |     | 40001           | North Adelaide                                |    | 40038           | Edwardstown/ Morphettville                        |
| 40021           | Elizabeth East                                      |     | 40006           | Burnside - Wattle Park                        |    | 40039           | Marion - South                                    |
| 40022           | Elizabeth/ Smithfield - Elizabeth North             |     | 40007           | Glenside - Beaumont/ Toorak Gardens           |    | 40040           | Mitchell Park/ Warradale                          |
| 40023           | One Tree Hill                                       |     | 40008           | Athelstone                                    |    | 40041           | Belair/ Bellevue Heights/ Blackwood               |
| 40024           | Enfield - Blair Athol                               |     | 40009           | Paradise - Newton                             |    | 40042           | Colonel Light Gardens/ Mitcham                    |
| 40025           | Northgate - Northfield/ Valley View - Gilles Plains |     | 40010           | Rostrevor - Magill                            |    | 40043           | Panorama                                          |
| 40026           | Windsor Gardens                                     |     | 40011           | Norwood (SA)/ St Peters - Marden              |    | 40044           | Aberfoyle Park/ Coromandel Valley/ Flagstaff Hill |
| 40027           | Dry Creek - North/ Pooraka                          |     | 40012           | Payneham - Felixstow                          |    | 40045           | Aldinga                                           |
| 40028           | Ingle Farm                                          |     | 40013           | Nailsworth - Broadview/ Prospect/ Walkerville |    | 40046           | Christie Downs/ Hackham West - Huntfield Heights  |
| 40029           | Para Hills/ Salisbury East                          |     | 40014           | Goodwood - Millswood                          |    | 40047           | Christies Beach/ Lonsdale                         |
| 40030           | Parafield/ Parafield Gardens/ Paralowie             |     | 40015           | Unley - Parkside                              |    | 40048           | Clarendon/ McLaren Vale/ Willunga                 |
| 40031           | Salisbury/ Salisbury North                          |     | 40034           | Hope Valley - Modbury                         | 3% | 40049           | Hackham - Onkaparinga Hills/ Seaford              |
| 40032           | Golden Grove/ Greenwith                             |     | 40053           | Beverley/ Hindmarsh - Brompton                |    | 40050           | Happy Valley/ Happy Valley Reservoir/ Woodcroft   |
| 40033           | Highbury - Dernancourt                              |     | 40054           | Flinders Park/ Seaton - Grange                |    | 40051           | Morphett Vale - East/ Morphett Vale - West        |
| 40034           | Hope Valley - Modbury                               | 97% | 40055           | Henley Beach                                  |    | 40052           | Reynella                                          |
| 40035           | Modbury Heights/ Redwood Park                       |     | 40056           | Charles Sturt - North West                    |    |                 |                                                   |
| 40036           | St Agnes - Ridgehaven                               |     | 40057           | West Lakes                                    |    |                 |                                                   |
|                 |                                                     |     | 40058           | Dry Creek - South/ Port Adelaide/ The Parks   |    |                 |                                                   |

Where a PHA is split between a local health network boundary, the data were allocated to the PHA with the greater percentage footprint.

**Supplementary Table 2: Country of origin of the population within greater capital cities and greater Adelaide regions**

| <b>2021 Census</b>                   | <b>Northern</b> | <b>Central + Southern</b> | <b>Greater Adelaide *</b> | <b>Australia (Greater CC)</b> | Greater Sydney | Greater Melbourne | Greater Brisbane | Greater Perth | Greater Hobart | Greater Darwin | Greater Canberra |
|--------------------------------------|-----------------|---------------------------|---------------------------|-------------------------------|----------------|-------------------|------------------|---------------|----------------|----------------|------------------|
| Population (Total)                   | 417,994         | 851,826                   | 1,387,290                 | 17,020,559                    | 5,231,147      | 4,917,750         | 2,526,238        | 2,116,647     | 247,086        | 139,902        | 454,499          |
| Australian born                      | 64.4            | 68.7                      | 68.7                      | 61.3                          | 56.8           | 59.9              | 68.3             | 59.5          | 76.6           | 63.8           | 67.5             |
| Aboriginal Population                | 2.4             | 1.3                       | 1.7                       | 1.8                           | 1.7            | 0.7               | 3.0              | 2.0           | 4.5            | 10.4           | 2.0              |
| Born: English speaking countries     | 8.2             | <b>8.7</b>                | 8.4                       | 8.5                           | 6.9            | 6.3               | 10.8             | 15.5          | 5.9            | 6.2            | 6.3              |
| Born: non-English speaking countries | 21.3            | 19.1                      | 19.2                      | 25.8                          | 31.8           | 29.4              | 12.9             | 20.5          | 13.0           | 21.6           | 22.4             |
| > 5yrs resident - AUS                | 16.8            | 14.4                      | 14.7                      | 20.7                          | 25.7           | 23.7              | 12.9             | 16.8          | 9.2            | 16.1           | 17.6             |
| < 5yrs resident - AUS                | 3.9             | 4.2                       | 3.9                       | 4.4                           | 5.4            | 5.0               | 3.0              | 2.9           | 3.5            | 4.9            | 4.3              |

All data in table is as a % of Total population in greater capital cities (data in first row)

\* Numbers of people self-reporting in Greater Adelaide Area are higher than the aggregate values of Southern +Central +Northern due to a small number of PHAs that are captured in the Greater Adelaide region that fall outside the catchment PHAs for the three metropolitan Local Health Networks within Adelaide.

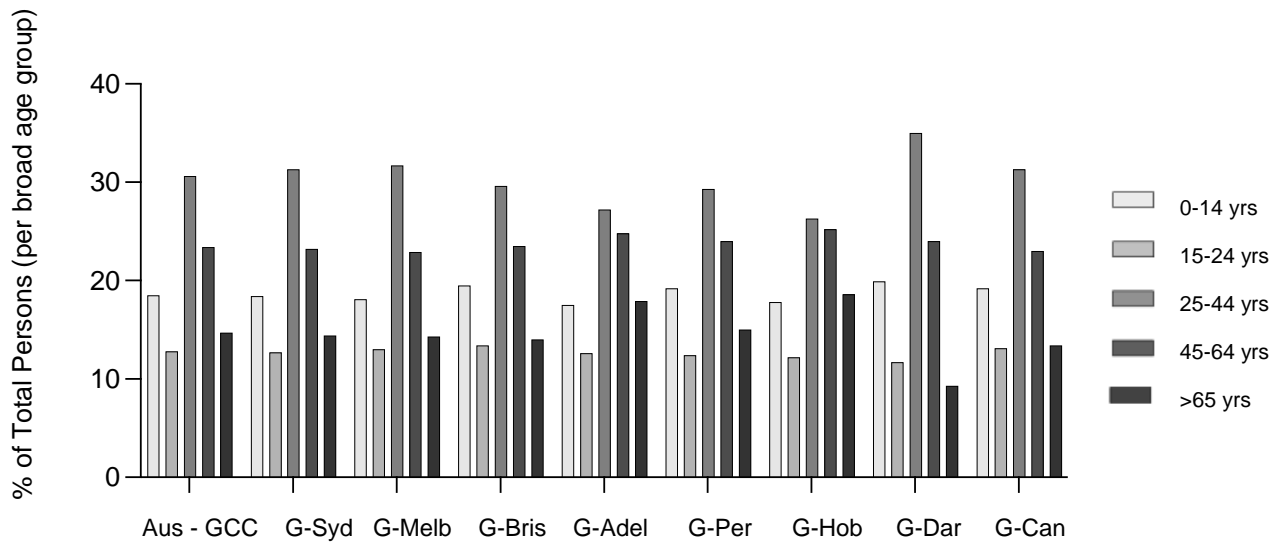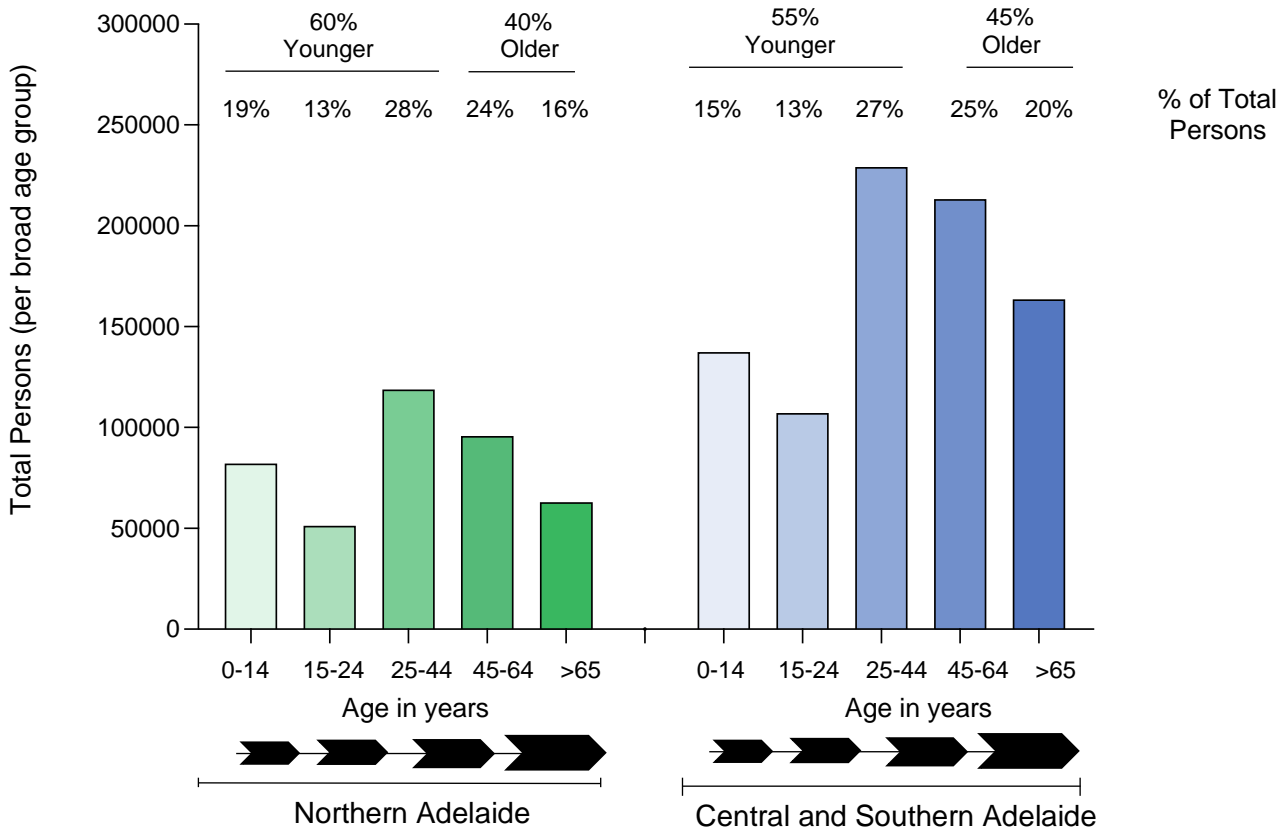

**Supplementary Figure 1: Younger population within the Northern Adelaide region.**

Broad age distribution for the A) Greater capital cities (grey bars) (percentage of Total persons) and B) Northern region (green bars) and Central and Southern regions combined (blue bars) (Total persons). Increasing age indicated by the size of the arrows. The proportions of younger persons (under 44 years) and older persons (above 45 years) are indicated above the individual bars in graph B. Data from 2020 Estimated resident population released in 2021.
